# Supplementary material for: In situ doping and synthesis of two-dimensional nanomaterials using mechano-chemistry
Source: Royal Society of Chemistry journal article supplement (doi:10.1039/c8nh00369f), 2018-12-01
Supplement: c8nh00369f1.pdf [file c8nh00369f1.pdf]

# *In-situ* doping and synthesis of two-dimensional nanomaterials using mechano-chemistry

Srikanth Mateti<sup>a</sup>, Alexey M. Glushenkov<sup>a,b</sup>, Lu Hua Li<sup>a</sup>, Qian Ma<sup>c</sup>, Chunyi Zhi<sup>d</sup>, and Ying Chen<sup>\*a</sup>

<sup>a</sup> Institute for Frontier Materials, Deakin University, Geelong, Victoria 3216, Australia

<sup>b</sup> Department of Chemical Engineering, The University of Melbourne, Parkville, Victoria 3010, Australia.

<sup>c</sup> Centre for Additive Manufacturing, School of Engineering, RMIT University, Melbourne, Victoria 3000, Australia.

<sup>d</sup> Department of Materials Science and Engineering, City University of Hong Kong, China.

E-mail: ian.chen@deakin.edu.au

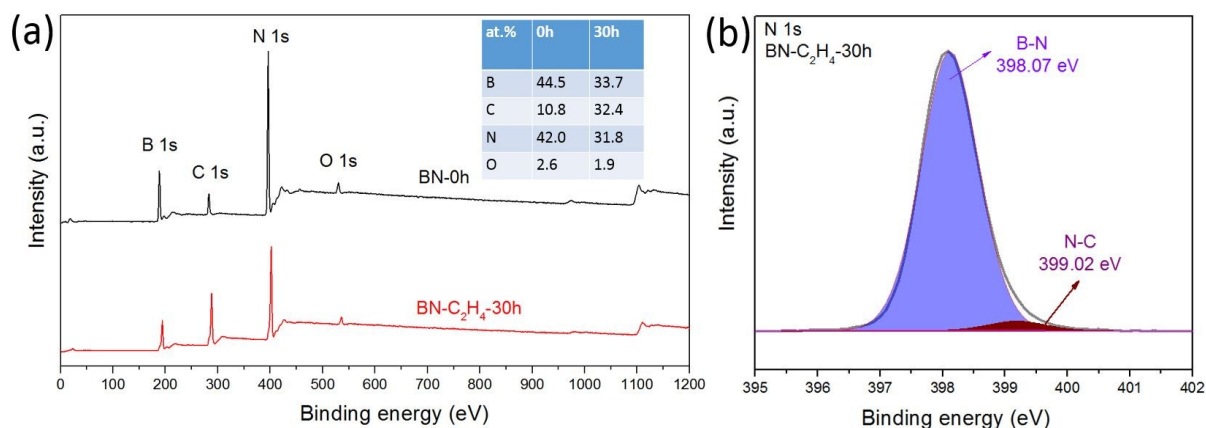

**Figure S1.** (a) Initial and after milling, carbon content in BN; (b) N1s spectra of BN milled in C<sub>2</sub>H<sub>4</sub> for 30h.

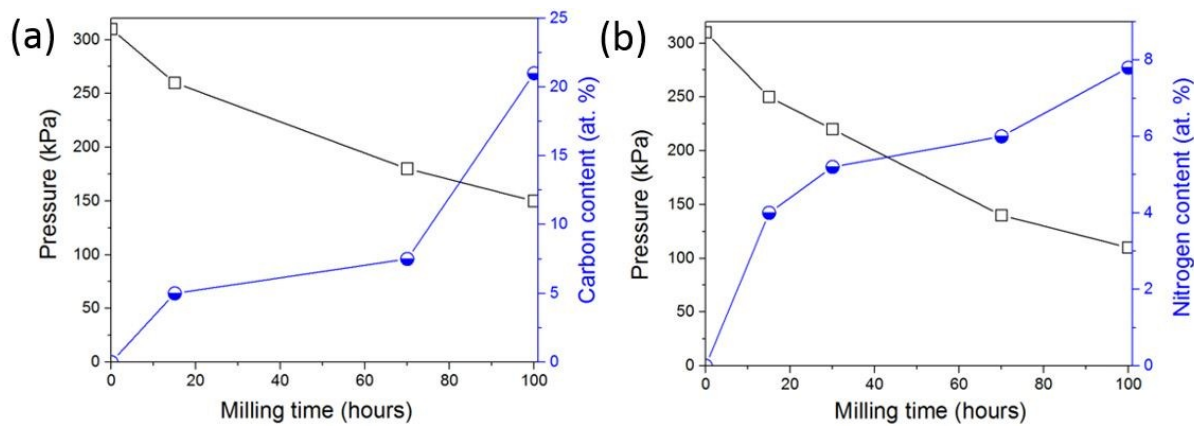

**Figure S2.** Carbon content (a), nitrogen content with change in pressure during milling in WS<sub>2</sub> from EDS analysis (b).

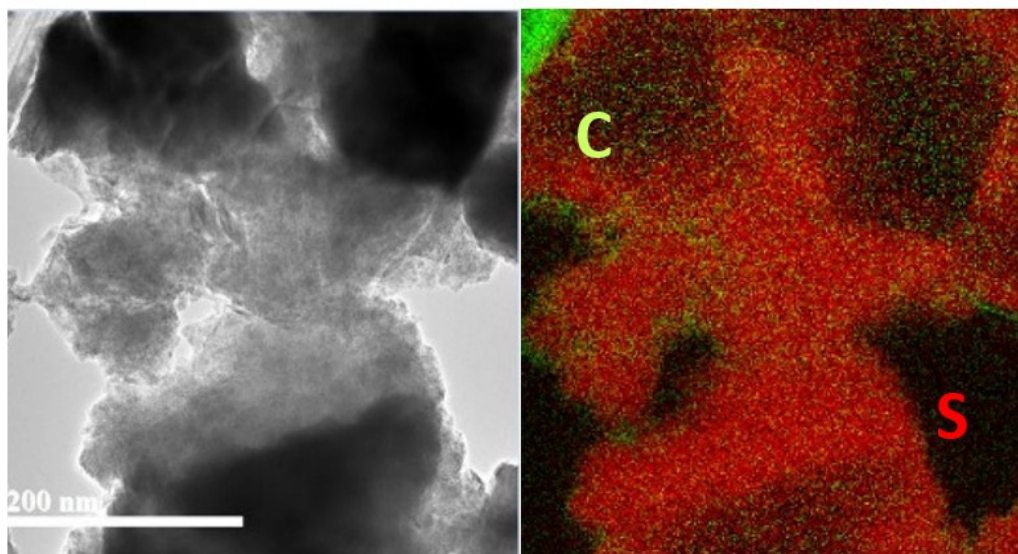

**Figure S3.** Carbon and Sulphur overlay mapping of carbon doped WS<sub>2</sub>.
